# Supplementary material for: Kombuchas from green and black teas reduce oxidative stress, liver steatosis and inflammation, and improve glucose metabolism in Wistar rats fed a high-fat high-fructose diet
Source: Royal Society of Chemistry journal article supplement (doi:10.1039/d1fo02106k), 2021-01-01
Supplement: d1fo02106k1.pdf [file d1fo02106k1.pdf]

## Supplementary material

**Table S1. Biometric parameters and food consumption of Wistar rats after consuming kombuchas from green and black teas for 10 weeks.**

| Variables                                                   | AIN93-M                      | HFHF                          | GTK                           | BTK                           |
|-------------------------------------------------------------|------------------------------|-------------------------------|-------------------------------|-------------------------------|
| Final weight (g)                                            | 415.00 ± 34.50 <sup>a</sup>  | 438.10 ± 66.65 <sup>a</sup>   | 415.30 ± 37.07 <sup>a</sup>   | 409.60 ± 50.08 <sup>a</sup>   |
| Weight gain (g)                                             | 65.00 ± 22.70 <sup>a</sup>   | 71.25 ± 38.1 <sup>a</sup>     | 44.90 ± 30.69 <sup>a</sup>    | 44.90 ± 23.14 <sup>a</sup>    |
| Abdominal perimeter*<br>(cm)                                | 18.90 ± 0.78 <sup>a</sup>    | 19.42 ± 1.40 <sup>a</sup>     | 19.10 ± 1.50 <sup>a</sup>     | 19.00 ± 1.32 <sup>a</sup>     |
| Lee index                                                   | 292.80 ± 14.55 <sup>a</sup>  | 299.00 ± 11.88 <sup>a</sup>   | 287.50 ± 9.50 <sup>a</sup>    | 287.00 ± 13.53 <sup>a</sup>   |
| Food consumption* (g)                                       | 1367.00 ± 69.10 <sup>a</sup> | 1045.60 ± 30.22 <sup>b</sup>  | 1051.20 ± 77.15 <sup>b</sup>  | 1044.70 ± 105.27 <sup>b</sup> |
| Food consumption*<br>(kcal)                                 | 4964.00 ± 72.96 <sup>b</sup> | 5341.90 ± 497.09 <sup>a</sup> | 5529.50 ± 405.82 <sup>a</sup> | 5442.80 ± 548.48 <sup>a</sup> |
| Food efficiency ratio*                                      | 0.05 ± 0.02 <sup>a</sup>     | 0.07 ± 0.03 <sup>a</sup>      | 0.06 ± 0.02 <sup>a</sup>      | 0.04 ± 0.02 <sup>a</sup>      |
| Energy food efficiency<br>ratio (g.1000kcal <sup>-1</sup> ) | 13.30 ± 4.42 <sup>a</sup>    | 12.60 ± 5.74 <sup>a</sup>     | 8.10 ± 5.51 <sup>a</sup>      | 8.10 ± 3.58 <sup>a</sup>      |
| Total consumption of<br>kombucha (mL)                       | NA                           | NA                            | 1322.4 ± 138.24 <sup>a</sup>  | 1390.8 ± 159.64 <sup>a</sup>  |
| Daily consumption of<br>total phenolics (mg/kg)             | NA                           | NA                            | 10.3 ± 1.25 <sup>b</sup>      | 17.1 ± 1.58 <sup>a</sup>      |

NA: not applied (groups that did not consume the kombuchas). Results were expressed as means ± standard deviation (n=8). \*Variables are not normally distributed. Means followed by different letters within each row are significantly different ( $p < 0.05$ ) by ANOVA followed by Newman-Keuls test (parametric test) or Kruskal-Wallis followed by Dunn's test (nonparametric test). AIN-93M: group of animals fed a standard diet (normal control group); HFHF: group of animals fed a high-fat high fructose diet (positive control); GTK: group of animals fed a HFHF and diluted green tea kombucha (30% v/v) *ad libitum*; BTK: group of animals fed a HFHF and diluted black tea kombucha (30% v/v) *ad libitum*.

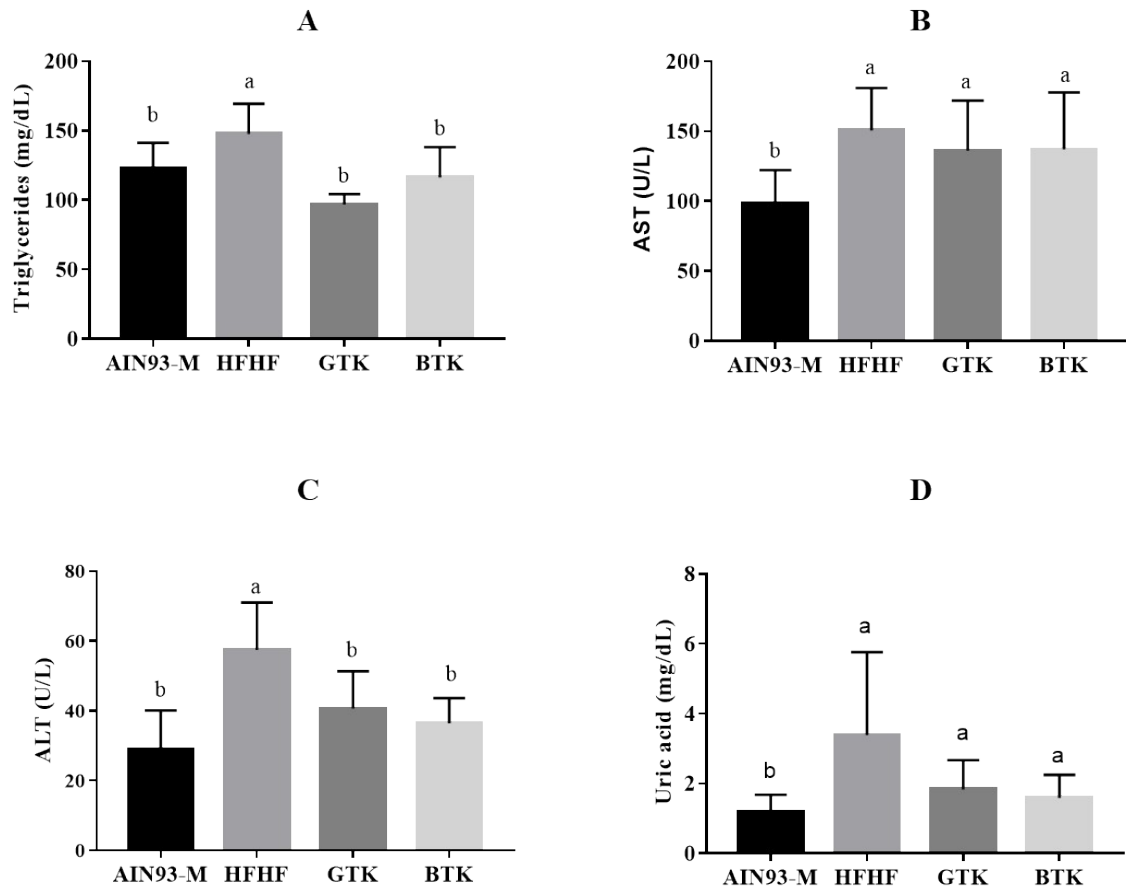

**Figure S1. Serum biochemical values of Wistar rats after consumption of kombuchas from green and black teas for 10 weeks.** (A) Triglycerides; (B) aspartate aminotransferase (AST); (C) alanine aminotransferase (ALT); (D) Uric acid. Data analyzed by colorimetric methods using serum for triglycerides and plasma for AST, ALT, and uric acid. Values expressed as means and standard deviation (n = 8/group). Data analyzed by one-way ANOVA and *post-hoc* of Newman-Keuls at 5% probability. Different letters indicate significant differences (p<0.05). AIN-93M: group of animals fed a standard diet (normal control group); HFHF: group of animals fed a high-fat high fructose diet (positive control); GTK: group of animals fed a HFHF and diluted green tea kombucha (30% v/v) *ad libitum*; BTK: group of animals fed a HFHF and diluted black tea kombucha (30% v/v) *ad libitum*.
